# Supplementary material
Source: ML conference proceedings conference paper supplement (https://proceedings.neurips.cc/paper_files/paper/2017/hash/a00e5eb0973d24649a4a920fc53d9564-Abstract.html)
Supplement: Supplementary file [file a00e5eb0973d24649a4a920fc53d9564-Supplemental.zip]

## A Technical Lemmas

**Lemma 2.** Let  $H_b(p) := -p \log_2 p - (1-p) \log_2(1-p)$ , be the binary entropy function. Then,

$$H_b(p) \geq 1 - 4(p - 1/2)^2.$$

**Proof** First, note that the first two derivatives of  $H$  are

$$\begin{aligned} H'_b(p) &= \log_2(1-p) - \log_2 p, \\ H''_b(p) &= -\frac{1}{\ln(2)p(1-p)}. \end{aligned}$$

We show that the following function

$$\varphi(p) := H_b(p) - \left(1 - 4\left(p - \frac{1}{2}\right)^2\right),$$

is non-negative on  $[0, 1]$  (note that, since  $\varphi$  is continuous, it is bounded from below on  $[0, 1]$  and its minimum is attained on some local minimum in  $[0, 1]$ ). Let us locate all the extrema points of  $\varphi$  in  $(0, 1)$ . We have that,

$$\varphi'(p) = \log_2\left(\frac{1-p}{p}\right) + 8\left(p - \frac{1}{2}\right).$$

Therefore,  $\varphi(1/2) = 0$ , and since

$$\varphi''(p) = \frac{-1}{\ln(2)p(1-p)} + 8,$$

it follows that  $\varphi''(1/2) > 0$ , which implies that  $p = 1/2$  is a local minimum of  $\varphi$ . We claim that there are exactly two more extrema points of  $\varphi$  which are in fact local maximum points. To this end, note that

$$\varphi''(p) \begin{cases} > 0 & |p - 1/2| < c, \\ = 0 & |p - 1/2| = c, \\ < 0 & |p - 1/2| > c, \end{cases}$$

where  $c := \sqrt{1/4 - 1/(8 \ln(2))}$ . Therefore, by Rolle's Theorem,  $\varphi'$  does not vanish in  $0 < |p - 1/2| \leq c$ , and vanishes exactly once in  $p > 1/2 + c$  and exactly once in  $p < 1/2 - c$ . Since,  $\varphi''$  is strictly negative in  $|p - 1/2| > c$ , it follows that the other two stationary points of  $\varphi'$  are local maxima of  $\varphi$ . All in all, we have that if  $p' \in [0, 1]$  is a local minimum of  $\varphi$ , then  $p' \in \{0, 1/2, 1\}$ , which implies that

$$\varphi(p) \geq \min\{\varphi(0), \varphi(1/2), \varphi(1)\} = 0,$$

concluding the proof. ■

**Lemma 3.** When applied on problem (14) with oracles (15), the coordinates of iterates produced by oblivious stochastic CLIs form polynomials in  $\mu$  with random coefficients (which do not depend on  $\mu$ ) and whose degrees do not exceed the iteration number.

**Proof** Let  $\mathcal{A}$  be an oblivious stochastic CLI, and suppose we apply  $\mathcal{A}$  on the class of problems (14) parametrized by  $\mu$ , using oracles (15). We use mathematical induction to show that for any  $k = 0, 1, \dots$ , the coordinates of the  $k$ 'th iterate produced by such process can be expressed as distributions over  $\mathcal{P}_k$ , where  $\mathcal{P}_k$  denotes the set of all real polynomials with degree  $\leq k$ .

As the first iterate  $\mathbf{w}_i^{(0)}$  is allowed to depend only on  $L$  and  $n$ , the base case is trivial. For the inductive step, assume that any coordinate of  $\mathbf{w}_i^{(k)}$  can be expressed as a distribution over  $\mathcal{P}_k$ . Now, for any  $\mathbf{w}_i^{(k)}$ , the oracles answers of

Generalized first-order oracle:

$$O(\mathbf{w}_i^{(k)}; A, B, \mathbf{c}, i) = A(Q_\mu \mathbf{w}_i^{(k)} - \mathbf{q}) + B\mathbf{w}_i^{(k)} + \mathbf{c}$$

Steepest coordinate-descent oracle:

$$O(\mathbf{w}_i^{(k)}; j, i) = (I - (1/(Q_\mu)_{jj})\mathbf{e}_i(Q_\mu)_{j,*})\mathbf{w}_i^{(k)} - q_j/(Q_\mu)_{jj}\mathbf{e}_j \quad (17)$$

form a distribution over  $\mathcal{P}_{k+1}$ , as the random quantities involved in the expressions  $(A, B, j$  and  $i)$  do not depend on  $\mu$  (due to obliviousness) and the rest of the terms are either constant or linear in  $\mu$ . Lastly,  $\mathbf{w}_i^{(k+1)}$  are computed by simply summing up all the oracle answers, and as such, form again distributions over  $\mathcal{P}_{k+1}$ . ■

**Lemma 4.** *Let  $s(\mu)$  be a real polynomial of degree  $\leq k$ , and let  $L > 0$ . Then, there exists  $\delta > 0$  such that for any  $\mu \in (L - \delta, L)$  it holds that*

$$|s(\mu)\mu + 1| \geq (1 - \mu/L)^{k+1}.$$

**Proof** Assume for the sake of contradiction that for any  $\delta > 0$ , there exists  $\mu \in (L - \delta, L)$  such that

$$|s(\mu)\mu + 1| < \left(1 - \frac{\mu}{L}\right)^{k+1}.$$

Define

$$q(\mu) := s(L(1 - \mu))L(1 - \mu) + 1 \quad (18)$$

and denote the corresponding coefficients by  $q(\mu) = \sum_{j=0}^{k+1} q_j \mu^j$ . We show by induction that  $q_j = 0$  for all  $j = 0, \dots, k$ . For  $j = 0$  we have that since for any  $\delta > 0$  there exists some  $\hat{\mu} \in (0, 1 - (L - \delta)/L)$  such that

$$|q(\hat{\mu})| < \left(1 - \frac{L(1 - \hat{\mu})}{L}\right)^{k+1} = \hat{\mu}^{k+1},$$

it holds, by continuity, that

$$|q_0| = |q(0)| = \left| \lim_{\mu \rightarrow 0^+} q(\mu) \right| \leq \lim_{\mu \rightarrow 0^+} \mu^{k+1} = 0.$$

Now, if  $q_0 = \dots = q_{m-1} = 0$  for  $m < k + 1$  then

$$|q_m| = \left| \frac{q(0)}{\mu^m} \right| = \left| \lim_{\mu \rightarrow 0^+} \frac{q(\mu)}{\mu^m} \right| \leq \lim_{\mu \rightarrow 0^+} \mu^{k+1-m} = 0.$$

Thus, proving the induction claim. This, in turns, implies that  $q(\mu) = q_{k+1}\mu^{k+1}$ . Now, by Equation (18), it follows that  $q_{k+1} = q(1) = 1$ . Hence,  $q(\mu) = \mu^{k+1}$ . Lastly, using Equation (18) again yields

$$s(\mu)\mu + 1 = q\left(1 - \frac{\mu}{L}\right) = \left(1 - \frac{\mu}{L}\right)^{k+1},$$

which contradicts our assumption, thus concluding the proof. ■
